# Supplementary material
Source: MDPI journal article supplement (https://www.mdpi.com/2073-4433/12/7/861)
Supplement: s1 [file s1]

## Supporting Information

In total, 108 target species, including 29 alkanes, 11 alkenes, 18 aromatic hydrocarbons, 1 alkyne, 34 chlorocarbons, and 15 oxygenated volatile organic compounds, are listed in Table S1. Due to the detection limit of the laboratory analytical method, not all species could be detected in every sample, so the number of species detected at each point was different.

**Table S1.** The targeting species.

| Alkane                 | Alkene                      | Chlorocarbon                   | OVOCs                   |
|------------------------|-----------------------------|--------------------------------|-------------------------|
| Ethane                 | Ethylene                    | Chloromethane                  | Ethanol                 |
| Propane                | Propylene                   | Chloroethane                   | Isopropanol             |
| iso-Butane             | 1,3-Butadiene               | Dichloromethane                | Acrolein                |
| n-Butane               | 1-Butene                    | Bromomethane                   | Acetone                 |
| Cyclopentane           | trans-2-Butene              | 1,2-Dichloroethane             | 2-Butanone              |
| n-Pentane              | cis-2-Butene                | 1,1-dichloroethane             | 4-Methyl-2-pentanone    |
| iso-Pentane            | Isoprene                    | 1,2-Dichloropropane            | 2-Hexanone              |
| Cyclohexane            | trans-2-Pentene             | Trichloromethane               | Tetrahydrofuran         |
| Methylcyclopentane     | cis-2-Pentene               | Dichlorodifluoromethane        | Methyl tert-butyl ether |
| 2,3-Dimethylbutane     | 1-Pentene                   | 1,1,1-Trichloroethane          | Ethenyl ethanoate       |
| n-Hexane               | 1-Hexene                    | 1,1,2-Trichloroethane          | Ethyl acetate           |
| 2,2-Dimethylbutane     | <b>Alkyne</b>               | Fluoro trichloro methane       | Methyl methacrylate     |
| 2-Methylpentane        | Acetylene                   | Bromodichloromethane           | Carbon tetrachloride    |
| 3-Methylpentane        | <b>Aromatic hydrocarbon</b> | 1,1,2,2-tetrachloroethane      | Carbon disulfide        |
| Methylcyclohexane      | Benzene                     | 1,2-Dichlorotetrafluoroethane  | 1,4-dioxane             |
| n-Heptane              | Toluene                     | 1,1,2-Trichlorotrifluoroethane |                         |
| 2,4-Dimethylpentane    | Styrene                     | 1,2-Dibromoethane              |                         |
| 2-Methylhexane         | Ethylbenzene                | Chlorodibromomethane           |                         |
| 2,3-Dimethylpentane    | m,p-Xylene                  | Tribromomethane                |                         |
| 3-Methylhexane         | o-Xylene                    | Vinyl chloride                 |                         |
| 2,2,4-Trimethylpentane | 1,3,5-Trimethylbenzene      | Vinylidene chloride            |                         |
| 2,3,4-Trimethylpentane | 1,2,4-Trimethylbenzene      | trans-1,2-Dichloroethylene     |                         |
| 2-Methylheptane        | Isopropylbenzene            | cis-1,2-Dichloroethene         |                         |
| 3-Methylheptane        | n-Propylbenzene             | cis-1,3-Dichloropropene        |                         |
| n-Octane               | m-Ethyltoluene              | trans-1,3-Dichloropropene      |                         |
| n-Nonane               | p-Ethyltoluene              | Trichloroethylene              |                         |
| n-Decane               | o-Ethyltoluene              | Tetrachloroethylene            |                         |
| Undecane               | 1,2,3-Trimethylbenzene      | Hexachlorobutadiene            |                         |
| Dodecane               | 4-Ethyltoluene              | Chlorobenzene                  |                         |
|                        | m-Diethylbenzene            | Benzyl chloride                |                         |
|                        | p-Diethylbenzene            | 1,3-Dichlorobenzene            |                         |
|                        | Naphthalene                 | 1,4-Dichlorobenzene            |                         |
|                        |                             | 1,2-Dichlorobenzene            |                         |
|                        |                             | 1,2,4-trichlorobenzene         |                         |

The relatively high concentration of TFT-A was mainly due to the high concentrations of styrene, ethylbenzene, m,p-xylene, o-xylene, etc. at 8:00 (Fig. S1). Some studies have found that species such as styrene, ethylbenzene, m,p-xylene, and o-xylene are mainly related to emissions from solvent use (Liu *et al.*, 2008; Mo *et al.*, 2016), which indicates that the relatively high values at TFT-A at 8:00 can be attributed to contamination by sources in addition to traffic emission. To eliminate this possible contamination, the 8:00 TFT-A sample was not included in subsequent calculations.

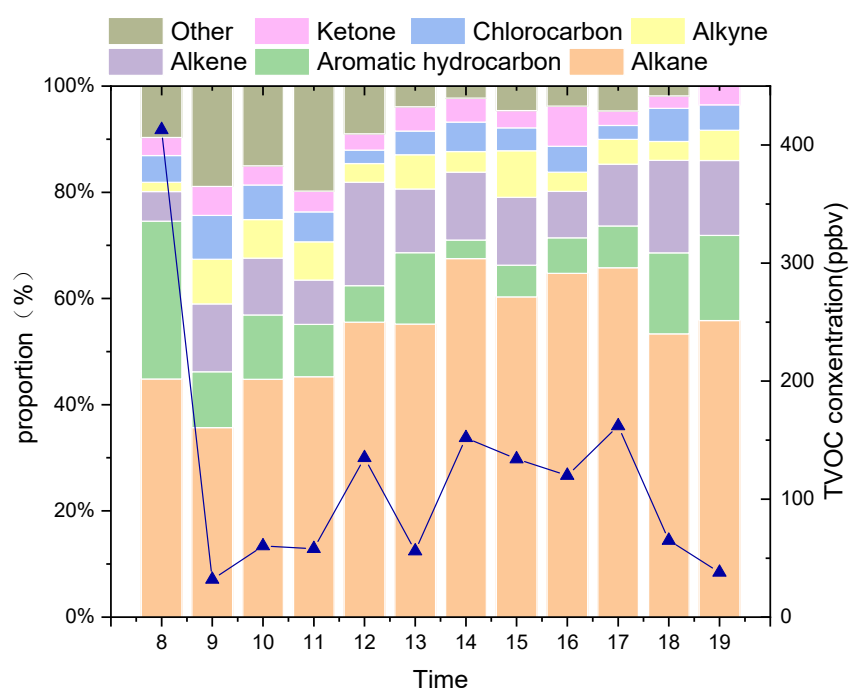

**Figure S1.** Temporal pattern of VOCs at the inlet of the Tianfu tunnel (TFT-A).

### Quality Control and Quality Assurance

Each SUMMA canister was cleaned in the laboratory five times using a can cleaning system and then repeatedly rinsed with high-purity nitrogen to remove interfering substances before sampling. After cleaning, each SUMMA canister was placed under vacuum for 24 hours, and a pressure gauge was used to perform a leak check to ensure that the seal was intact. All tests were performed based on the EPA method. The measured VOCs were calibrated within a calibration range of 0.1–10  $\mu\text{g}\cdot\text{L}^{-1}$ , and the calibration curve had an  $R^2$  higher than 0.99. To control the background contamination generated during sampling, transport and analysis, field blanks were prepared during sampling and analysis. To control the interference introduced by laboratory reagents and other factors during analysis, high-purity nitrogen was injected into a clean sample canister as a laboratory blank. At least two blank samples and laboratory blank samples were measured for each batch of samples, and no target compounds or substances above the method detection limit were detected in any of the blank samples. In addition, to ensure the stability of the experimental analysis process, blank samples were analysed every 10 samples, and the relative deviation of parallel samples was less than 15%.
